# Supplementary material for: Synthesizing greenhouse gas fluxes across nine European peatlands and shrublands – responses to climatic and environmental changes
Source: Copernicus journal article supplement (doi:10.5194/bg-9-3739-2012), 2012-10-04
Supplement: Supplementary file 1 [file bg-9-3739-2012-supplement.pdf]

## Supplementary material

Table S1. Characteristics of the upper soil layer, generally the O-horizon, at nine experimental sites depending on treatment. Data represents annual mean values and standard error in brackets is an indication of the spatial variability at the sites.

| Site   | Treatment                       | Depth<br>cm | Bulk density<br>g cm <sup>-3</sup> | pH(H <sub>2</sub> O) <sup>a</sup> | Total C<br>% by weight | Total N<br>% by weight | Soil water NH <sub>4</sub> <sup>+</sup><br>mg N L <sup>-1</sup> | Soil water NO <sub>3</sub> <sup>-</sup><br>mg N L <sup>-1</sup> | Soil NH <sub>4</sub> <sup>+b</sup><br>μg N g <sup>-1</sup> dry soil | Soil NO <sub>3</sub> <sup>-</sup><br>μg N g <sup>-1</sup> dry soil | Microbial biomass C<br>mg C g <sup>-1</sup> dry soil |
|--------|---------------------------------|-------------|------------------------------------|-----------------------------------|------------------------|------------------------|-----------------------------------------------------------------|-----------------------------------------------------------------|---------------------------------------------------------------------|--------------------------------------------------------------------|------------------------------------------------------|
| EE-Män | Control                         | 0-15        | 0.01                               | 3.4                               | 53                     | 0.6                    | 4.07 (2.70)                                                     | 2.55 (0.23)                                                     | 3.5 (2.4)                                                           | 2.2 (0.2)                                                          | na                                                   |
|        | Drainage                        |             | na                                 | 2.2                               | 43                     | 1.2                    | 4.25 (1.10)                                                     | 1.28 (1.11)                                                     | 3.4 (0.9)                                                           | 1.0 (0.9)                                                          | na                                                   |
| SE-Sto | Control                         | 0-10        | 0.10                               | 4.0                               | 50                     | 1.2                    | na                                                              | na                                                              | na                                                                  | na                                                                 | na                                                   |
| SE-Fäj | Control                         | 0-10        | 0.02                               | 3.9                               | 40                     | 1.5                    | 0.63 (0.55)                                                     | 0.52 (0.19)                                                     | na                                                                  | na                                                                 | na                                                   |
|        | NH <sub>4</sub> NO <sub>3</sub> |             | na                                 | 3.9                               | na                     | na                     | na                                                              | 0.92 (0.31)                                                     | na                                                                  | na                                                                 | na                                                   |
| UK-Whi | Control                         | 0-10        | 0.08                               | 3.7                               | 46                     | 1.1                    | 0.17 (0.22)                                                     | 0.05 (0.09)                                                     | 26.3 (6.9)                                                          | 0.16 (0.02)                                                        | na                                                   |
|        | NH <sub>4</sub>                 |             | 0.12                               | 3.7                               | 47                     | 1.3                    | 0.87 (0.37)                                                     | 0.12 (0.13)                                                     | 85.9 (42.4)                                                         | 0.07 (0.02)                                                        | na                                                   |
|        | NO <sub>3</sub>                 |             | 0.11                               | 4.0                               | 49                     | 1.4                    | 0.29 (0.34)                                                     | 0.44 (0.51)                                                     | 63.1 (7.8)                                                          | 0.21 (0.05)                                                        | na                                                   |
| UK-Clo | Control                         | 0-9         | 0.09                               | 3.9                               | 45                     | 1.2                    | 0.23 (0.17)                                                     | 0.09 (0.06)                                                     | 5.0 (2.8)                                                           | 0.4 (0.7)                                                          | 2.2 (0.7)                                            |
|        | Drought                         |             | na                                 | 3.9                               | na                     | na                     | 0.32 (0.25)                                                     | 0.15 (0.16)                                                     | 3.1 (1.7)                                                           | 0.3 (0.4)                                                          | 4.0 (1.8)                                            |
|        | Warming                         |             | na                                 | 3.9                               | na                     | na                     | 0.17 (0.11)                                                     | 0.03 (0.03)                                                     | 5.9 (3.0)                                                           | 0.4 (0.6)                                                          | 2.5 (0.4)                                            |
| DK-Mol | Control                         | 0-3         | 0.21                               | 3.7                               | 20                     | 1.1                    | 0.87 (0.44)                                                     | 1.55 (0.69)                                                     | 10.1 (8.0)                                                          | 2.4 (2.7)                                                          | 0.6 (0.2)                                            |
|        | Drought                         |             | 0.20                               | na                                | 21                     | 1.1                    | 1.26 (0.67)                                                     | 1.24 (0.83)                                                     | 5.6 (2.7)                                                           | 2.8 (2.7)                                                          | 0.6 (0.2)                                            |
|        | Warming                         |             | 0.23                               | na                                | 19                     | 1.0                    | 1.59 (0.78)                                                     | 1.66 (1.29)                                                     | 8.3 (4.8)                                                           | 4.0 (4.0)                                                          | 0.5 (0.2)                                            |
| DK-Bra | Control                         | 0-2         | 0.08                               | 3.1                               | 23                     | 1.2                    | 7.45 (3.76)                                                     | 6.79 (3.77)                                                     | 10.8 (3.9)                                                          | 2.3 (1.7)                                                          | 1.1 (0.2)                                            |
|        | Drought                         |             | na                                 | na                                | na                     | na                     | 9.91 (5.95)                                                     | 5.52 (3.95)                                                     | na                                                                  | na                                                                 | na                                                   |
|        | Warming                         |             | na                                 | na                                | na                     | na                     | 8.46 (5.12)                                                     | 6.55 (2.54)                                                     | na                                                                  | na                                                                 | na                                                   |
| NL-Old | Control                         | 0-4         | 0.21                               | 4.2                               | 45                     | 1.9                    | 1.13 (0.30)                                                     | 1.10 (0.29)                                                     | 72.9 (20.3)                                                         | 11.4 (2.9)                                                         | 1.3 (0.1)                                            |
|        | Drought                         |             | 0.21                               | na                                | 42                     | 1.8                    | na                                                              | na                                                              | 62.5 (15.8)                                                         | 7.7 (2.4)                                                          | na                                                   |
|        | Warming                         |             | 0.27                               | na                                | 45                     | 2.0                    | na                                                              | na                                                              | 69.6 (20.9)                                                         | 12.8 (3.2)                                                         | na                                                   |
| ES-Gar | Control                         | 0-12        | 1.20                               | 8.1                               | 1                      | 0.1                    | 0.11 (0.06)                                                     | < 0.02                                                          | 0.77 (0.17)                                                         | 0.12 (0.03)                                                        | 0.21 (0.03)                                          |
|        | Drought                         |             | 1.29                               | na                                | 1                      | 0.1                    | 0.12 (0.04)                                                     | < 0.02                                                          | 0.71 (0.22)                                                         | 0.09 (0.02)                                                        | 0.20 (0.04)                                          |
|        | Warming                         |             | 1.14                               | na                                | 1                      | 0.1                    | 0.16 (0.07)                                                     | < 0.02                                                          | 0.84 (0.16)                                                         | 0.07 (0.03)                                                        | 0.21 (0.01)                                          |

na, not assessed

<sup>a</sup> Soil pH was measured in 1 M KCl at EE-Män and in 0.01 M CaCl<sub>2</sub> at DK-Mol and DK-Bra. These extraction agents result in lower pH values compared to soil suspended in water.

<sup>b</sup> The extraction agent varied with site, thus soil NH<sub>4</sub><sup>+</sup> data should only be used to compare treatments at the site level

Table S2. Characteristics of the lower soil layer, generally below the O-horizon, in untreated control plots at seven experimental sites.

| <b>Site</b> | <b>Bulk density</b><br>g cm <sup>-3</sup> | <b>pH(H<sub>2</sub>O)</b> <sup>a</sup> | <b>Total C</b><br>% by weight | <b>Total N</b><br>% by weight |
|-------------|-------------------------------------------|----------------------------------------|-------------------------------|-------------------------------|
| EE-Män      | 1.22                                      | 3.4                                    | 44                            | 0.64                          |
| UK-Whi      | 0.08                                      | 3.7                                    | 46                            | 0.98                          |
| UK-Clo      | 0.86                                      | 4.0                                    | 19                            | 0.51                          |
| DK-Mol      | 1.41                                      | 4.3                                    | 1                             | 0.06                          |
| DK-Bra      | 1.17                                      | 3.5                                    | 3                             | 0.18                          |
| NL-Old      | 1.14                                      | 3.9                                    | 2                             | 0.08                          |
| ES-Gar      | na                                        | 8.3                                    | na                            | na                            |

na, not assessed

<sup>a</sup> Soil pH was measured in 1 M KCl at EE-Män and in 0.01 M CaCl<sub>2</sub> at DK-Mol and DK-Bra. These extraction agents result in lower pH values compared to soil suspended in water.

Table S3. Aboveground biomass C and N, total N deposition, nitrate leaching and mean annual water table depth at nine experimental sites depending on treatment.

| Site   | Treatment                       | Aboveground biomass C | Aboveground biomass N | Total N deposition <sup>a</sup>      | NO <sub>3</sub> <sup>-</sup> leaching | Water table depth |
|--------|---------------------------------|-----------------------|-----------------------|--------------------------------------|---------------------------------------|-------------------|
|        |                                 | g C m <sup>-2</sup>   | g N m <sup>-2</sup>   | g N m <sup>-2</sup> yr <sup>-1</sup> | g N m <sup>-2</sup> yr <sup>-1</sup>  | cm below surface  |
| EE-Män | Control                         | na                    | na                    | 0.8                                  | na                                    | 15                |
|        | Drainage                        | na                    | na                    | na                                   | na                                    | 38                |
| SE-Sto | Control                         | na                    | na                    | 0.2                                  | na                                    | 22                |
|        | NH <sub>4</sub> NO <sub>3</sub> | na                    | na                    | 4.2                                  | na                                    | na                |
| SE-Fäj | Control                         | na                    | na                    | 1.5                                  | na                                    | 4                 |
|        | NH <sub>4</sub> NO <sub>3</sub> | na                    | na                    | 5.5                                  | na                                    | na                |
| UK-Whi | Control                         | 2684                  | 49.8                  | 0.8                                  | na                                    | 12                |
|        | NH <sub>4</sub>                 | 2435                  | 59.2                  | 6.4                                  | na                                    | na                |
|        | NO <sub>3</sub>                 | 2354                  | 54.6                  | 6.4                                  | na                                    | na                |
| UK-Clo | Control                         | 1790                  | 34                    | 1.8                                  | 0.4                                   | 30                |
|        | Drought                         | na                    | na                    | na                                   | 0.3                                   | na                |
| DK-Mol | Control                         | 650                   | 9                     | 0.9                                  | 1.2                                   | na                |
|        | Drought                         | na                    | na                    | 0.9                                  | 0.8                                   | na                |
|        | Warming                         | na                    | na                    | na                                   | 0.5                                   | na                |
| DK-Bra | Control                         | 343                   | 11                    | 1.7                                  | 0.3                                   | na                |
|        | Drought                         | na                    | na                    | na                                   | 0.3                                   | na                |
|        | Warming                         | na                    | na                    | na                                   | 0.2                                   | na                |
| NL-Old | Control                         | 584                   | 10                    | 2.2                                  | 1.5                                   | na                |
|        | Drought                         | na                    | na                    | na                                   | 1.5                                   | na                |
|        | Warming                         | na                    | na                    | na                                   | 2.7                                   | na                |
| ES-Gar | Control                         | 360                   | 5                     | 0.8                                  | na                                    | na                |

na, not assessed

<sup>a</sup> Total N deposition was derived from Williams et al. (1999) at EE-Män, Persson et al. (2004) at SE-Sto and SE-Fäj, Bealey et al. (2003) at UK-Clo, Avila et al. (2009) at ES-Gar and bulk deposition collectors at UK-Whi, DK-Mol, DK-Bra, NL-Old and ES-Gar

## References

- Avila, A., Molowny-Horas, R., Gimeno, B. S., and Peñuelas, J.: Analysis of decadal time series in wet N concentrations at five rural sites in NE Spain, *Water Air Soil Poll.*, 207, 123-138, 2010.
- Bealey, W. J., Sheppard, L. J., Malcolm, H., Cape, J. N., Davison, A., Carvalho, L., Dragosits, U., Harding, K., Hall, J., Fowler, D., Osborn, D., and Sutton, M. A.: Development of the UK air pollution information system (APIS), contract report to the JNCC (No. F90-01-538), 52 pp., 2003.
- Persson, C., Ressner, E., and Klein, T.: Nationell miljöövervakning - MATCH-Sverige modellen, SMHI, Norrköping, Sweden, 46 pp., 2004.
- Williams, B. L., Buttler, A., Grosvernier, P., Francez, A. J., Gilbert, D., Ilomets, M., Jauhiainen, J., Matthey, Y., Silcock, D. J., and Vasander, H.: The fate of  $\text{NH}_4\text{NO}_3$  added to *Sphagnum magellanicum* carpets at five European mire sites, *Biogeochemistry*, 45, 73-93, 1999.
